# Supplementary material
Source: Springer Nature journal article supplement (https://www.springermedizin.de/resource/supplementary/12936_2011_1798_MOESM3_ESM.pdf/9541804)

EAG response (mV)

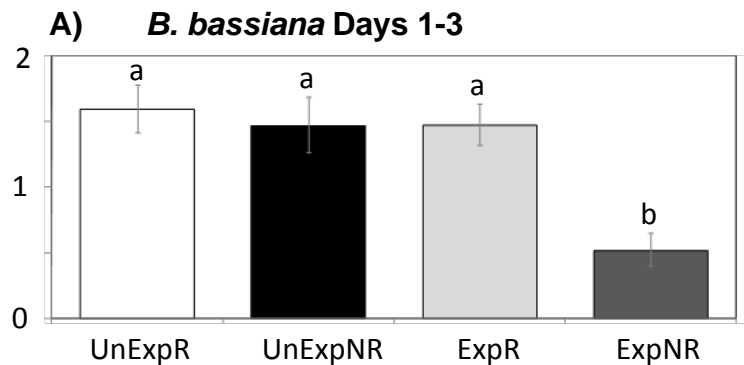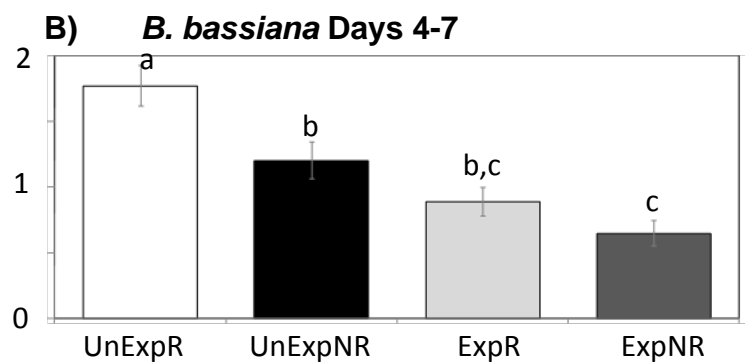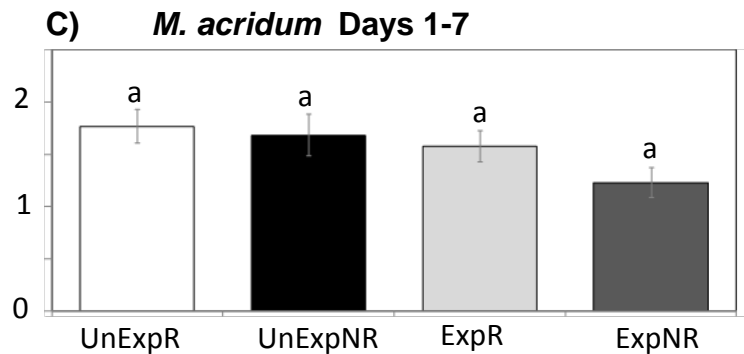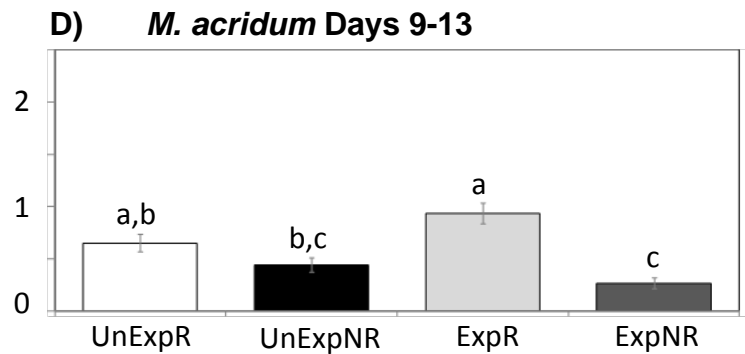

Treatment

Supplement: MOESM3 [file 9541804]
